# Supplementary material for: Wellbeing of Indigenous Peoples in Canada, Aotearoa (New Zealand) and the United States: A Systematic Review
Source: MDPI journal article supplement (doi:10.3390/ijerph18115832), 2021-05-28
Supplement: s1 [file s1]

**Supplementary Table S1:** Included papers characteristics

| Authors (year)            | Region           | Study Setting    | Indigenous groups                                                          | Participant details                                                                                                                                                               | Was wellbeing part of main aim (YES), or component of broader research question (BROAD)? |
|---------------------------|------------------|------------------|----------------------------------------------------------------------------|-----------------------------------------------------------------------------------------------------------------------------------------------------------------------------------|------------------------------------------------------------------------------------------|
| <b>Canada</b>             |                  |                  |                                                                            |                                                                                                                                                                                   |                                                                                          |
| Adelson (1998)[16]        | Northern Quebec  | unclear          | Whapmagoostui Cree                                                         | Over 20% of the adult women and men of Whapmagoostui. Unclear if all Indigenous.                                                                                                  | YES                                                                                      |
| Alaazi et. al. (2015)[17] | Winnipeg         | unclear          | Inuit, First Nations (Ojibwe & Cree, Ojibwe, Cree, Saulteaux, Dene), Métis | 14 Indigenous and 6 key informant participants (age range 30-50 years). Unclear if key informants are Indigenous.                                                                 | BROAD                                                                                    |
| Auger et. al. (2016)[18]  | Vancouver        | community/social | First Nations, Métis, Other                                                | 35 - mix of ages, genders, Aboriginal ethnicity, and roles in the community. All Indigenous.                                                                                      | YES                                                                                      |
| Auger (2019)[19]          | British Columbia | community/social | Métis                                                                      | 23 women and 10 men (age range 19–84 years; mean=46). All Indigenous                                                                                                              | YES                                                                                      |
| Bartlett (2004)[20]       | Manitoba         | community/social | Métis                                                                      | 17 Metis women - Elders in 1 focus group (mean age 59 years) and 1st (mean age 36 years) and 2nd generation (mean age 31 years) urban-dwelling adults in another. All Indigenous. | YES                                                                                      |
| Bartlett (2005)[21]       | Manitoba         | community/social | Métis                                                                      | 17 Metis women - Elders in 1 focus group (mean age 59 years) and 1st (mean age 36 years) and 2nd generation (mean age 31 years) urban-dwelling adults in another. All Indigenous. | YES                                                                                      |
| Baskin & Davey (2015)[22] | Toronto          | community/social | Aboriginal                                                                 | 10 seniors and 2 Elders - all women (age range 60-75 years). All Indigenous.                                                                                                      | YES                                                                                      |

|                                   |                                         |                                         |                                |                                                                                                                                                                                                                                                                                                                                                                                                                                                       |       |
|-----------------------------------|-----------------------------------------|-----------------------------------------|--------------------------------|-------------------------------------------------------------------------------------------------------------------------------------------------------------------------------------------------------------------------------------------------------------------------------------------------------------------------------------------------------------------------------------------------------------------------------------------------------|-------|
| Brooks-Cleator et. al. (2019)[23] | Ottawa                                  | community/social                        | First Nations, Inuit           | 32 Indigenous older adults (23 Inuit; 8 males, 15 women) 9 First Nations (3 males, 6 women) (age range 55-79 years). All Indigenous.                                                                                                                                                                                                                                                                                                                  | BROAD |
| Castleden et. al. (2016)[24]      | Pictou Landing First Nation             | community/social                        | Mi'kmaw                        | 10 Elders - 8 women. All Indigenous.                                                                                                                                                                                                                                                                                                                                                                                                                  | YES   |
| Condon et. al. (1995)[25]         | Holman                                  | community/social                        | Copper Inuit                   | 20 young male household heads (age range 23-35 years). All Indigenous.                                                                                                                                                                                                                                                                                                                                                                                | BROAD |
| Cunsolo Willox et. al. (2012)[26] | Rigolet, Nunatsiavut                    | community/social                        | Rigolet Inuit                  | 43 women, 29 males (age range 9-85 years). All Indigenous.                                                                                                                                                                                                                                                                                                                                                                                            | YES   |
| Fillion et. al. (2014)[27]        | Inuvialuit Settlement Region            | community/social                        | Inuit                          | 23 participants from Inuit organizations and community representatives, university-based researchers from the Inuit Health Survey and Northwest Territories governmental organisations. Some Indigenous and some non-Indigenous.                                                                                                                                                                                                                      | BROAD |
| Fraser et. al. (2018)[28]         | Nunavik, Quebec                         | community/social                        | Inuit - Nunavimmiut            | 2 elders (women), 11 mothers, and 1 father (age range 20-65 years). All Indigenous.                                                                                                                                                                                                                                                                                                                                                                   | YES   |
| Fraser et. al. (2019)[29]         | Nunavik, Quebec                         | community/social                        | Inuit - Nunavimmiut            | 2 elders (women), 11 mothers, and 1 father (age range 20-65 years). All Indigenous.                                                                                                                                                                                                                                                                                                                                                                   | YES   |
| Gone (2011)[58]                   | Northern Canada                         | hospital/health centre/place of healing | First Nations                  | 19 staff and clients - The current and former executive directors of the Lodge, the counseling program coordinator, and a member of the counseling program's oversight committee (3 women, all middle aged - unclear if Indigenous). 4 current and former counselors (2 male, 2 woman, aged early 40s to late 60s - all Indigenous). 11 clients who had already concluded their treatment (7 men, 4 female, age ranged from 20-60s - all Indigenous). | BROAD |
| Graham & Martin (2016)[30]        | Thunderchild First Nation, Saskatchewan | multiple settings                       | néhiyawak (Plains Cree people) | 15 participants (age range 18-71 years); 7 male and 8 women. 3 Elders. All Indigenous.                                                                                                                                                                                                                                                                                                                                                                | YES   |
| Harper et. al. (2015)[31]         | Nunatsiavut, Labrador                   | community/social                        | Inuit                          | 11 government employees (2 male, 9 women, age range 21-50+ years). Photovoice with 11 community members (5 women, 6 male). Community members Indigenous - unsure about government employees.                                                                                                                                                                                                                                                          | BROAD |

|                                    |                              |                             |                                                                                                                                  |                                                                                                                                                                            |       |
|------------------------------------|------------------------------|-----------------------------|----------------------------------------------------------------------------------------------------------------------------------|----------------------------------------------------------------------------------------------------------------------------------------------------------------------------|-------|
| Hatala et. al. (2016)[33]          | Saskatchewan                 | community/social            | Cree                                                                                                                             | 4 Canadian Cree Elders - 2 males, 2 women (age range 53-83 years). All Indigenous.                                                                                         | YES   |
| Hatala et. al. (2019)[32]          | Saskatoon, Saskatchewan      | community/social            | Plains Cree and Metis                                                                                                            | 28 youth - 12 male, 16 women (age range 15-25 years), 21 nêhiyaw (Plains Cree) and 7 Métis. All Indigenous.                                                                | YES   |
| Keightley et. al. (2011)[34]       | Kenora, Ontario              | community/social            | Ojibway                                                                                                                          | 10 participants - range of Elders, traditional healers and mental health case workers. 7 male and 3 women (age range 30-70 years) - 8 Indigenous, 1 English and 1 unknown. | BROAD |
| Kral et. al. (2011)[35]            | Nunavut                      | community/social            | Inuit                                                                                                                            | 50 Inuit (age range 14–94 years), 25 women and males. All Indigenous.                                                                                                      | YES   |
| Kyoon-Achan et. al. (2018)[36]     | Manitoba                     | community/social            | Eight First Nation communities representing four First Nation languages; (Ininiwak-Cree, Dakota, Dene and Ojibway or Anishnaabe) | 61 participants - 54 interviews and 1 focus group. 7 participants in focus group, including 3 workers who's Indigenous status unknown - remainder Indigenous.              | YES   |
| Lemelin et. al. (2010)[37]         | Hudson Bay lowlands, Ontario | community/social            | Cree                                                                                                                             | 12 Cree harvesters (8 men and 4 women), and 10 Elders (6 men and 4 women). All Indigenous                                                                                  | YES   |
| Matheson et. al. (2020)[38]        | All                          | multiple settings           | First Nations, Metis                                                                                                             | 134 participants – Group one 78 (57 women, 21 males; age mean=41.62 years; SD=11.15). Group two 56 (47 women, 9 males; age mean=36.62; SD=11.91). All Indigenous.          | YES   |
| Mikraszewicz & Richmond (2019)[39] | Pic River, Ontario           | community/social            | Biigtigong Nishnaabeg                                                                                                            | 4 adults and 5 youth. All Indigenous                                                                                                                                       | YES   |
| Moore (2019)[40]                   | Nunatsiavut                  | school/university/workplace | Inuit                                                                                                                            | 5 Inuit women (age range 28-55 years). All Indigenous                                                                                                                      | BROAD |
| Motz & Currie (2019)[41]           | Lethbridge, Alberta          | school/university/workplace | First Nations, Metis, Inuit                                                                                                      | 142 participants - 63.1% of the sample identified as First Nations, 23.2% as Indigenous generally (without a specific affiliation), and 13.5% as Métis. All Indigenous.    | BROAD |

|                                       |                                       |                   |                            |                                                                                                                                                                                                                |       |
|---------------------------------------|---------------------------------------|-------------------|----------------------------|----------------------------------------------------------------------------------------------------------------------------------------------------------------------------------------------------------------|-------|
| O'Neil et. al. (2016)[42]             | British Columbia                      | multiple settings | First Nations              | 14 from First Nations Health Council, 7 from First Nations Health Directors Association and 13 from provincial health system. Policy roundtable with 60 participants. Some Indigenous and some non-Indigenous. | BROAD |
| Pace & Gabel (2018)[43]               | Newfoundland and Labrador             | community/social  | Southern Inuit             | 5 Southern Inuit older adults (age range 50–75 years, all women) and 5 youth (age range 8–24 years; 2 women and 3 male). All Indigenous.                                                                       | BROAD |
| Parker et. al. (2019)[44]             | Sioux Lookout, Ontario                | community/social  | First Nations              | Approximately 100 participants. All Indigenous.                                                                                                                                                                | BROAD |
| Parlee et. al. (2005)[46]             | Fort McPherson, Northwest Territories | community/social  | Teetl'it Gwich'in          | 75 women. All Indigenous.                                                                                                                                                                                      | BROAD |
| Parlee et. al. (2007)[45]             | Lutsel K'e, Northwest Territories     | community/social  | Dene                       | Home-visit interviews with each household in the community. All Indigenous.                                                                                                                                    | YES   |
| Petrasek MacDonald et. al. (2015)[47] | Nunatsiavut, Labrador                 | community/social  | Inuit                      | 17 youth (age range 15–25 years). All Indigenous.                                                                                                                                                              | YES   |
| Richmond et. al. (2005)[48]           | Alert Bay, British Columbia           | community/social  | Namgis First Nation        | Community sample: 15 employed and 4 unemployed members, and 4 key informants (age range 25-72 years). All community members Indigenous – unsure about key informants.                                          | YES   |
| Schill et. al. (2019)[49]             | Kelowna, British Columbia             | community/social  | Urban Indigenous Canadians | Preliminary sharing circle - 6 community members and 2 community stakeholders. Interviews 9 urban Indigenous adults (age 55+). Final sharing circle - 7 community Elders and 2 other. All Indigenous.          | YES   |
| Spiegel et. al. (2020)[50]            | British Columbia                      | community/social  | Tsleil-Waututh Nation      | 4 Elders and 4 younger members of the Tsleil-Waututh Nation. All Indigenous.                                                                                                                                   | BROAD |
| Stewart (2008)[51]                    | Nil data                              | unclear           | First Nations or Metis     | 5 First Nations or Metis individuals. All Indigenous.                                                                                                                                                          | BROAD |
| Tam et. al. (2013)[52]                | James Bay, Ontario                    | community/social  | Fort Albany First Nation   | 39 community members - 17 males, 22 women (age range 22-73 years; mean=42). All Indigenous.                                                                                                                    | YES   |

|                               |                                                                  |                  |                                                                                                      |                                                                                                                                                      |       |
|-------------------------------|------------------------------------------------------------------|------------------|------------------------------------------------------------------------------------------------------|------------------------------------------------------------------------------------------------------------------------------------------------------|-------|
| Thompson et. al. (2013)[53]   | 2 First Nations service centers: 1 metropolitan, 1 northern city | community/social | First Nations                                                                                        | 15 First Nations grandparents - 14 women, 1 male. All Indigenous.                                                                                    | YES   |
| Tobias & Richmond (2014)[54]  | North Shore of Lake Superior                                     | community/social | Anishinaabe, The Batchewana First Nation of Ojibways, and The Ojibways of the Pic River First Nation | 46 Elders. All Indigenous.                                                                                                                           | BROAD |
| Waddell et. al. (2017)[55]    | Cape Dorset, Nunavut                                             | community/social | Inuit                                                                                                | 6 male, 4 women. All Indigenous.                                                                                                                     | YES   |
| Wilson (2003)[56]             | Northern Ontario                                                 | community/social | Anishinabek (Ojibway and Odawa)                                                                      | 14 community members (9 women, 5 men). All Indigenous.                                                                                               | BROAD |
| Zurba & Bullock (2019)[57]    | Nationwide - mainly British Columbia & Ontario                   | unclear          | First Nations, Metis, Inuit, Settler, Other.                                                         | 13 male, 2 women, 3 no response (age range 30-60+ years). All Indigenous.                                                                            | YES   |
| <b>Aotearoa (New Zealand)</b> |                                                                  |                  |                                                                                                      |                                                                                                                                                      |       |
| Beavis et. al. (2019)[62]     | Wellington and Northland                                         | community/social | Māori                                                                                                | 4 Māori households (18 individuals) - 7 adults - 4 women, 3 male (age range 32-65 years) 11 children present (age range 2-43 years). All Indigenous. | YES   |
| Bell et. al. (2017)[63]       | Nil data                                                         | community/social | Māori                                                                                                | 7 male (age range 28-56 years), 8 women (age range 25-49 years). All Indigenous                                                                      | YES   |
| Butcher & Breheny (2016)[64]  | Eastern Bay of Plenty                                            | community/social | Māori                                                                                                | 8 older Māori (66-79 years old). All Indigenous.                                                                                                     | BROAD |
| Hapeta et. al. (2019)[65]     | Bay of Plenty                                                    | community/social | Māori, Pasifika, Pākehā                                                                              | Head coach (Indigenous), team members and staff of one Rugby team - (18 players and 6 coaches). Some Indigenous and some non-Indigenous.             | YES   |

|                                  |                                                                                           |                                         |       |                                                                                                                                                                                                                       |       |
|----------------------------------|-------------------------------------------------------------------------------------------|-----------------------------------------|-------|-----------------------------------------------------------------------------------------------------------------------------------------------------------------------------------------------------------------------|-------|
| Hopkirk & Wilson (2014)[66]      | Nil data                                                                                  | hospital/health centre/place of healing | Māori | 2 Māori occupational therapists, 1 New Zealander occupational therapist and 2 Māori health specialists. 4 Indigenous, 1 non-Indigenous.                                                                               | YES   |
| Lawson-Te Aho et. al. (2019)[67] | Nil data                                                                                  | community/social                        | Māori | 20 participants - included Māori researchers, Te Tiriti experts, Kaumātua/ esteemed elders; researchers, academics, Māori homelessness activists and experts in decolonisation and re-indigenisation. All Indigenous. | BROAD |
| Mark & Lyons (2010)[69]          | Auckland and 2 other rural towns                                                          | community/social                        | Māori | 6 Māori spiritual healers - 5 women and 1 male. All Indigenous.                                                                                                                                                       | YES   |
| Mark & Lyons (2014)[68]          | Auckland and 2 other rural towns                                                          | community/social                        | Māori | 12 spiritual healers - 6 Māori (5 women, 1 male) and 6 non-Māori. Some Indigenous and some non-Indigenous.                                                                                                            | BROAD |
| Raerino et. al. (2013)[70]       | Auckland                                                                                  | unclear                                 | Māori | 12 women and 7 men (age range 18-75+ years). All Indigenous.                                                                                                                                                          | YES   |
| Rata et. al. (2008)[71]          | Taranaki & Wellington                                                                     | community/social                        | Māori | 10 Māori – 2 women, 8 male (age range 20-75 years; mean=42). All Indigenous.                                                                                                                                          | BROAD |
| Rawson (2016)[72]                | Christchurch                                                                              | unclear                                 | Māori | Four focus groups 8-12 participants each, 1 key stakeholder interview. Mix of families and elders, students, parents and staff from a Māori school. All Indigenous.                                                   | YES   |
| Roche et. al. (2018)[73]         | Various localities (Auckland, Wellington, Christchurch, Hamilton, Dunedin, plus regional) | community/social                        | Māori | 18 Māori leaders - 8 male and 10 women. All Indigenous.                                                                                                                                                               | YES   |
| Rua et. al. (2017)[74]           | Hamilton, Ruatoki, Whakatone                                                              | community/social                        | Māori | 5 Māori men (age range 36-45 years). All Indigenous.                                                                                                                                                                  | BROAD |

|                             |                                                                            |                   |                                 |                                                                                                                                                                                                                                                                                                                                    |       |
|-----------------------------|----------------------------------------------------------------------------|-------------------|---------------------------------|------------------------------------------------------------------------------------------------------------------------------------------------------------------------------------------------------------------------------------------------------------------------------------------------------------------------------------|-------|
| Spiller et. al. (2011)[75]  | Nil data                                                                   | unclear           | Māori and Pākehā                | 54 interviews – 4 businesses:<br>. Trust owned by people of hapu, subtribe<br>. Joint venture Māori and Pākehā<br>. Private company owned by Māori<br>. Pākehā owners, business promoted Māori cultural tourism experiences, employed Māori guides, and was mentored by kaumatua, elders. Some Indigenous and some non-Indigenous. | YES   |
| Willing et. al. (2019)[76]  | Across NZ                                                                  | unclear           | Māori                           | 4 women, 2 male (age range 25-55+ years including 2 Elders). All Indigenous.                                                                                                                                                                                                                                                       | BROAD |
| Wilson (2008)[77]           | Nil data                                                                   | community/social  | Māori                           | 38 Māori women (age range 24-61 years). All Indigenous.                                                                                                                                                                                                                                                                            | YES   |
| <b>United States</b>        |                                                                            |                   |                                 |                                                                                                                                                                                                                                                                                                                                    |       |
| Andrade et. al. (2019)[79]  | Washington State, Arizona, Georgia                                         | multiple settings | American Indian, Alaska Natives | 10 Indian Health Service Cultural advisors, 3 Tribal Advisory Committee members, 3 Centres for Disease control staff, 1 Substance Abuse and Mental Health Services Administration member and 3 American Indian facilitators. Some Indigenous and some non-Indigenous.                                                              | YES   |
| Ayunerak et. al. (2014)[80] | Southwest Alaska                                                           | multiple settings | Yup'ik Inuit                    | 4 author perspectives - 2 elders and 2 local prevention workers. All Indigenous.                                                                                                                                                                                                                                                   | BROAD |
| Browne et. al. (2014)[81]   | Hawai'i                                                                    | community/social  | Native Hawaiians                | 24 Elders (21 women, 3 male; age range 60-94 years) 17 caregivers (11 women, 6 male; age range 38-77 years). All Indigenous.                                                                                                                                                                                                       | YES   |
| Buehler (1992)[82]          | South Central Montana                                                      | community/social  | Crow Indians                    | 13 Crow Indians, 5 non-Indian nurses and 2 non-Indian physicians associated with the Indian Health Service. Some Indigenous and some non-Indigenous.                                                                                                                                                                               | BROAD |
| Burnette (2018)[83]         | Multiple rural, federally recognised Indigenous reservation communities in | community/social  | Indigenous peoples of the US    | 29 Indigenous women (age range 22-74 years; mean=40), 20 health professionals (11 male; age range 26-76 years; mean=49). Some Indigenous and some non-Indigenous.                                                                                                                                                                  | BROAD |

|                                 |                                       |                   |                                       |                                                                                                                                                                                                                                                                                            |       |
|---------------------------------|---------------------------------------|-------------------|---------------------------------------|--------------------------------------------------------------------------------------------------------------------------------------------------------------------------------------------------------------------------------------------------------------------------------------------|-------|
|                                 | the southeastern United States.       |                   |                                       |                                                                                                                                                                                                                                                                                            |       |
| Burnette et. al. (2018)[84]     | Southeastern United States.           | community/social  | Indigenous peoples of the US          | 436 participants - 254 interviews, 217 participated in 27 focus groups, and 163 family interviews. Participants included professionals who worked with Indigenous peoples, elders (age 55 or older), adults (ages 24–54), and youth (ages 11–23). Some Indigenous and some non-Indigenous. | YES   |
| Carroll et. al. (2018)[85]      | Oklahoma                              | community/social  | Cherokee Nation                       | Cherokee Nation Medicine Keepers 11 elders (5 women; 6 men). All Indigenous                                                                                                                                                                                                                | BROAD |
| Christiansen et. al. (2019)[86] | American Southwest and Upper Mid-west | community/social  | Ojibwa, Potawatomi, Navajo            | 89 women - primary caregivers and tribal employees from tribal agencies, schools, and enterprises. All Indigenous.                                                                                                                                                                         | BROAD |
| Danes et. al. (2016)[87]        | Minnesota                             | unclear           | American Indians from Northern Ojibwe | 11 women, 4 male. All Indigenous.                                                                                                                                                                                                                                                          | BROAD |
| Deacon et. al. (2011)[88]       | South Central Oklahoma                | unclear           | Chickasaw Nation                      | 7 key informant employees at the Division of History and Culture of the Chickasaw. Various participants from a Search Conference (participatory planning meeting with stakeholders) – Some Indigenous and some non-Indigenous.                                                             | YES   |
| Elm et. al. (2016)[89]          | Nil data                              | unclear           | American Indian/Alaska Native         | 11 women - age range 20s to late 50s. Some Indigenous and some non-Indigenous.                                                                                                                                                                                                             | BROAD |
| Friesen et. al. (2015)[90]      | Nil data                              | unclear           | American Indian/Alaska Native         | Grup one: 15 women, 3 men. Group two: 6 women, 9 men. 2 youth advocates and 4 young adults. Age range 17-24 years. All Indigenous.                                                                                                                                                         | BROAD |
| Goodkind et. al. (2015)[91]     | Navajo Nation                         | multiple settings | Dine                                  | 14 youth (6 male, 8 women; age range 12-17 years), 15 parents/guardians (12 women, 3 male; age range 24-49 years), and 8 elders (all women; age range 54-90 years). Some Indigenous and some non-Indigenous.                                                                               | YES   |
| Grayshield et. al. (2015)[92]   | Western, Southwestern,                | community/social  | Native American                       | 11 Native American elders - 8 male, 3 women (age range 54-90 years). All Indigenous.                                                                                                                                                                                                       | BROAD |



|                               |                          |                             |                                                                          |                                                                                                                            |       |
|-------------------------------|--------------------------|-----------------------------|--------------------------------------------------------------------------|----------------------------------------------------------------------------------------------------------------------------|-------|
|                               | and upper<br>Midwest USA |                             |                                                                          |                                                                                                                            |       |
| Griffin-Pierce (1997)[93]     | Colorado                 | school/university/workplace | Navajo                                                                   | 3 women, 1 male, University students. All Indigenous                                                                       | YES   |
| Hilgendorf et. al. (2019)[94] | Northeast Wisconsin      | community/social            | Menominee Nation                                                         | 5 Menominee Wellness Initiative members in interviews, 12 in focus groups. Some Indigenous and some non-Indigenous.        | YES   |
| Hodge & Limb (2010)[95]       | Whole country            | community/social            | Native American - Lakota, Navajo/Dine, Chippewa/Ojibwa, Cherokee, Other  | 50 Native American experts - 32 women, 18 male (age mean=49.2 years). 8 non-Native participants, others all Indigenous.    | BROAD |
| Hulen et. al. (2019)[96]      | Flagstaff, Arizona       | community/social            | American Indian                                                          | 39 American Indian (8 male, 31 women) 22 health care providers (7 men, 15 women). Some Indigenous and some non-Indigenous. | YES   |
| Isaacson et. al. (2018)[97]   | Northern Plains          | community/social            | Native American                                                          | 6 Native American Elders (2 male, 4 women) 8 Native American youths (7 women, 1 male). All Indigenous.                     | YES   |
| Jacob et. al. (2019)[98]      | Nil data                 | school/university/workplace | Native American - 2 from Northwest Tribes and one from a Southwest Tribe | 3 women students. All Indigenous.                                                                                          | BROAD |
| Kading et. al. (2019)[99]     | Nil data                 | unclear                     | American Indian and First Nations (Anishinaabe)                          | 13 Anishinaabe (age range 19–29 years). All Indigenous.                                                                    | YES   |
| Kodish et. al. (2016)[100]    | California               | unclear                     | American Indian                                                          | 12 Tribal leaders (4 male, 8 women) 24 tribal members (4 male, 20 women). All Indigenous.                                  | BROAD |
| Lane (2018)[101]              | Standing Rock, Dakota    | community/social            | Native American                                                          | 3 women. All Indigenous.                                                                                                   | BROAD |
| Lassetter (2011)[102]         | Las Vegas                | community/social            | Native Hawaiian                                                          | 27 participants (11 women, 16 males; age range 23-62 years, mean=40). All Indigenous.                                      | YES   |
| Lassetter et. al. (2012)[103] | Las Vegas                | community/social            | Native Hawaiian                                                          | 27 participants (11 women, 16 males; age range 23-62 years, mean=40). All Indigenous.                                      | YES   |

|                               |                               |                   |                                                  |                                                                                                                                                                                                         |       |
|-------------------------------|-------------------------------|-------------------|--------------------------------------------------|---------------------------------------------------------------------------------------------------------------------------------------------------------------------------------------------------------|-------|
| Lewis (2011)[106]             | Bristol Bay, Southwest Alaska | community/social  | Alaska Native - Yup'ik Eskimo, Aleut, Athabascan | 26 Alaska Native Elders (age range 61-93 years). All Indigenous.                                                                                                                                        | BROAD |
| Lewis (2013)[104]             | Bristol Bay, Southwest Alaska | community/social  | Alaska Native - Yup'ik Eskimo, Aleut, Athabascan | 26 Alaska Native Elders (age range 61-93 years). All Indigenous.                                                                                                                                        | BROAD |
| Lewis (2014)[105]             | Bristol Bay, Southwest Alaska | community/social  | Alaska Native - Yup'ik Eskimo, Aleut, Athabascan | 25 Alaska Native Elders (age range 61-93 years), 14 women, 11 male. All Indigenous.                                                                                                                     | YES   |
| Lewton & Bydone (2000)[107]   | Nil data                      | unclear           | Navajo                                           | Number not reported - Navajo healers and their patients affiliated with Traditional Navajo religion, the Native American Church, and Pentecostal Christianity. Some Indigenous and some non-Indigenous. | BROAD |
| Look et. al. (2014)[108]      | 5 different Hawaiian Islands  | community/social  | Native Hawaiian                                  | 6 prominent kumu hula from 5 different Hawaiian Islands (1 male, 5 women). All Indigenous.                                                                                                              | YES   |
| Mitchell (2018)[109]          | Midwestern United States      | community/social  | American Indian                                  | 9 female, 2 male (age range 25-74 years). All Indigenous.                                                                                                                                               | BROAD |
| Moghaddam et. al. (2015)[110] | Midwestern United States      | multiple settings | American Indians and Alaska Natives              | 27 Community members (18 women, 9 male; age range 12–82 years) 11 service providers (5 male, 6 women; age range 26–70 years). 30 Indigenous and 8 non-Indigenous.                                       | BROAD |
| Moorehead et. al. (2015)[111] | Michigan                      | unclear           | Native American                                  | 18 traditional healers, clinically trained service providers, and cross-cultural mental health researchers. Some Indigenous and some non-Indigenous.                                                    | BROAD |
| Odom et. al. (2019)[112]      | Honolulu, Hawaii              | community/social  | Native Hawaiian                                  | 25 women, 13 men. Some Indigenous and some non-Indigenous.                                                                                                                                              | BROAD |
| Oneha (2001)[113]             | Wai'anae, Hawai'i             | community/social  | Native Hawaiian                                  | 13 men and women (age range 36-80 years). All Indigenous.                                                                                                                                               | BROAD |

|                                |                     |                   |                                     |                                                                                                                                                                                                                            |       |
|--------------------------------|---------------------|-------------------|-------------------------------------|----------------------------------------------------------------------------------------------------------------------------------------------------------------------------------------------------------------------------|-------|
| Shea et. al. (2019)[114]       | Oklahoma            | multiple settings | Miami Tribe                         | 32 Myaamia college students (59% female, 41% male, age mean=20), 6 Myaamia tribal seniors (all female, mean age=22) and 800 community members (observation data only). Unclear how many community members were Indigenous. | BROAD |
| Skewes & Blume (2019)[115]     | Montana             | community/social  | American Indians and Alaska Natives | 13 men, 12 women (age range 28–79 years). All Indigenous.                                                                                                                                                                  | BROAD |
| Trout et. al. (2018)[116]      | Arctic Alaska       | unclear           | Inupiaq Alaskan Native              | 11 Inupiaq youth (age range 14-22 years), 10 adults, 6 University students (age range 19-25 years). Some Indigenous and some non-Indigenous.                                                                               | BROAD |
| West et. al. (2012)[117]       | Chicago             | community/social  | American Indian                     | 107 American Indian youth and families (66% women, 41% under age of 25). All Indigenous.                                                                                                                                   | BROAD |
| Williamson et. al. (2019)[118] | Nil data            | community/social  | Native American                     | 4 IDD males (age range 19-24 years) 4 caregivers (3 fwomen, 1 male; age range 38-63 years). All IDD participants Indigenous, unclear if carers were.                                                                       | YES   |
| Wolsko et. al. (2006)[119]     | Southwestern Alaska | community/social  | Yup'ik Eskimos                      | 64 Yup'ik adults (age rang ~18-50+ years). All Indigenous.                                                                                                                                                                 | YES   |
